# Supplementary material for: Differential Diagnostic Models Between Vasovagal Syncope and Psychogenic Pseudosyncope in Children
Source: PubMed Central journal article supplement (PMC6989585; doi:10.3389/fneur.2019.01392), 2020-01-23
Supplement: Table_1.pdf [file Table_1.pdf]

## *Supplementary Material*

**Table S1** Baseline demographic data of patients diagnosed with VVS or PPS

| <b>Groups</b> | <b>Cases<br/>(n)</b> | <b>Gender<br/>(n, M/F)</b> | <b>Age (years)</b>   | <b>Weight (kg)</b>   | <b>Height (m)</b> | <b>BMI (kg/m<sup>2</sup>)</b> |
|---------------|----------------------|----------------------------|----------------------|----------------------|-------------------|-------------------------------|
| VVS           | 150                  | 72/78                      | 11.35 (10.93, 11.78) | 45.83 (43.37, 48.29) | 1.54 (1.51, 1.56) | 18.93 (18.32, 19.55)          |
| PPS           | 26                   | 14/12                      | 10.73 (9.80, 11.66)  | 44.32 (37.79, 50.86) | 1.49 (1.42, 1.55) | 19.49 (17.77, 21.20)          |
| $\chi^2/Z$    | -                    | 0.303                      | -1.139               | -0.844               | -1.424            | -0.477                        |
| p-value       | -                    | 0.58                       | 0.18                 | 0.40                 | 0.15              | 0.63                          |

BMI, body mass index; F, female; M, male; PPS, psychogenic pseudosyncope; VVS, vasovagal syncope
